# Supplementary material for: Extraction and Concentration of Waste Pueraria lobata Stems with Antioxidants and Anti-Melanogenesis Activity as a Novel Skin Whitening Agent for Natural Cosmetic Prototypes
Source: MDPI journal article supplement (doi:10.3390/ijms231810352), 2022-09-08
Supplement: s1 [file s1]

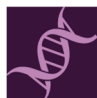

Article

# Extraction and concentration of waste *Pueraria lobata* stems with antioxidants and anti-melanogenesis activity as a novel skin whitening agent for natural cosmetic prototypes

Dan Gao <sup>1</sup>, Chong-Woon Cho <sup>2</sup>, Jin-Hyeok Kim <sup>2</sup>, Cheong-Taek Kim <sup>3</sup>, Won-Seok Jeong <sup>3</sup>, Ye Wang <sup>1</sup>, Xiwen Li <sup>1,\*</sup> and Jong-Seong Kang <sup>2,\*</sup>

<sup>1</sup> Institute of Chinese Materia Medica, China Academy of Chinese Medical Sciences, Beijing 100700, China

<sup>2</sup> College of Pharmacy, Chungnam National University, Daejeon 34134, Korea; chongw113@naver.com

<sup>3</sup> RNS Inc., Daejeon 34134, Korea

\* Correspondence: xwli@icmm.ac.cn (X.W.L.); kangjss@cnu.ac.kr (J.S.K.); Tel.: +86-10-8408-4107(X.W.L.); +82-42-821-5928 (J.S.K.)

Table S1. Skin irritation determination criteria.

| Mean score  | Criteria             |
|-------------|----------------------|
| 0.00–0.87   | No/slight irritation |
| 0.00–0.87   | Mild irritation      |
| 2.43 ~ 3.44 | Moderate irritation  |
| >3.45       | Severe irritation    |

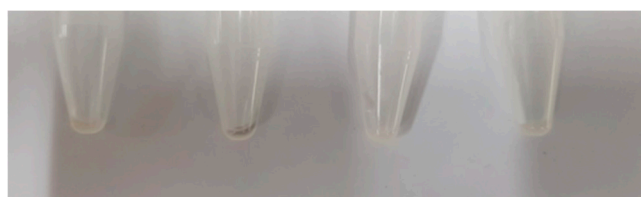

Normal      Control      Purified      Unpurified

**Figure S1.** Visual evaluation of each sample in B16F10 cells.

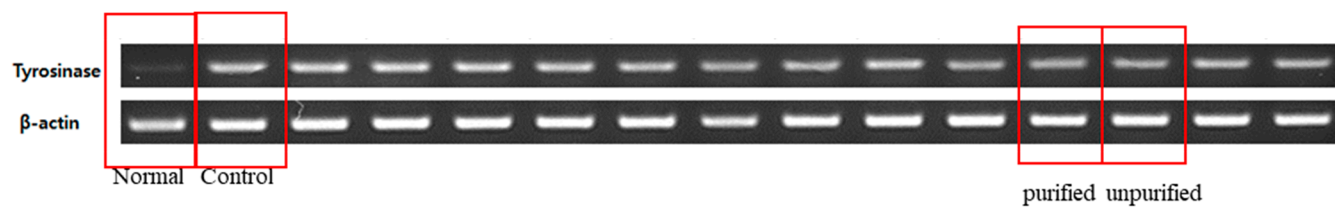

**Figure S2.** The original gel picture of this experiment.
